# Supplementary material
Source: PubMed Central journal article supplement (PMC3320946)
Supplement: supp_M111.246074_jbc.M111.246074-1.pdf [file supp_M111.246074_jbc.M111.246074-1.pdf]

## SUPPLEMENTAL MATERIAL

Supplementary Table S1a. List of proteins found in DRMs.

| Common proteins |                                                                         |              |                |            |                |
|-----------------|-------------------------------------------------------------------------|--------------|----------------|------------|----------------|
| Accession No    | Protein name                                                            | Folch method |                | Aceton ppt |                |
|                 |                                                                         | Score        | Unique peptide | Score      | Unique peptide |
| P11442          | <b>Clathrin heavy chain 1</b>                                           | 438          | 27             | 427        | 27             |
| P06687          | Sodium/potassium-transporting ATPase subunit alpha-3                    | 413          | 23             | 328        | 18             |
| P16086          | Spectrin alpha chain, brain                                             | 308          | 20             | 458        | 28             |
| Q63198          | Contactin-1 precursor                                                   | 306          | 19             | 360        | 23             |
| P68372          | Tubulin beta-2C chain                                                   | 283          | 17             | 266        | 15             |
| P39053          | Dynamin-1                                                               | 275          | 18             | 282        | 18             |
| P63017          | Heat shock cognate 71 kDa protein                                       | 273          | 16             | 329        | 18             |
| O08553          | Dihydropyrimidinase-related protein 2                                   | 269          | 16             | 276        | 17             |
| P50516          | <b>Vacuolar ATP synthase catalytic subunit A</b>                        | 260          | 14             | 240        | 14             |
| P38650          | Cytoplasmic dynein 1 heavy chain 1                                      | 214          | 16             | 341        | 25             |
| Q62261          | Spectrin beta chain, brain 1                                            | 203          | 14             | 344        | 22             |
| P62814          | <b>Vacuolar ATP synthase subunit B, brain isoform</b>                   | 201          | 12             | 261        | 16             |
| P05213          | Tubulin alpha-1B chain                                                  | 183          | 11             | 158        | 10             |
| P11980          | Pyruvate kinase isozymes M1/M2                                          | 176          | 12             | 158        | 10             |
| P59215          | Guanine nucleotide-binding protein G(o) subunit alpha                   | 166          | 9              | 214        | 12             |
| P82995          | <b>Heat shock protein HSP 90-alpha</b>                                  | 152          | 10             | 232        | 15             |
| Q9Z1G4          | Vacuolar proton translocating ATPase 116 kDa subunit a isoform 1        | 151          | 9              | 128        | 8              |
| O08599          | Syntaxin-binding protein 1                                              | 148          | 10             | 143        | 9              |
| P97846          | <b>Contactin-associated protein 1 precursor</b>                         | 147          | 11             | 102        | 7              |
| P07335          | Creatine kinase B-type                                                  | 139          | 8              | 147        | 8              |
| P15999          | <b>ATP synthase subunit alpha, mitochondrial precursor</b>              | 133          | 9              | 139        | 9              |
| P10860          | Glutamate dehydrogenase 1, mitochondrial precursor                      | 132          | 9              | 142        | 10             |
| P54290          | Voltage-dependent calcium channel subunit alpha-2/delta-1 precursor     | 130          | 9              | 148        | 10             |
| Q05546          | Tenascin-R precursor                                                    | 128          | 8              | 182        | 12             |
| P63101          | <b>14-3-3 protein zeta/delta</b>                                        | 127          | 8              | 126        | 8              |
| P54311          | <b>Guanine nucleotide-binding protein G(I)/G(S)/G(T) subunit beta-1</b> | 125          | 8              | 24         | 2              |

|        |                                                                            |     |   |     |    |
|--------|----------------------------------------------------------------------------|-----|---|-----|----|
| Q8R366 | Immunoglobulin superfamily member 8 precursor                              | 124 | 8 | 95  | 6  |
| P13596 | Neural cell adhesion molecule 1, 140 kDa isoform precursor                 | 122 | 7 | 104 | 7  |
| Q8CI94 | Glycogen phosphorylase, brain form                                         | 119 | 9 | 135 | 9  |
| P63259 | Actin, cytoplasmic 2                                                       | 117 | 6 | 147 | 8  |
| P04797 | <b>Glyceraldehyde-3-phosphate dehydrogenase</b>                            | 113 | 7 | 175 | 12 |
| P09117 | Fructose-bisphosphate aldolase C                                           | 110 | 6 | 125 | 8  |
| P10719 | <b>ATP synthase subunit beta, mitochondrial precursor</b>                  | 109 | 7 | 115 | 7  |
| Q9Z1E1 | <b>Flotillin-1</b>                                                         | 106 | 8 | 115 | 8  |
| P17427 | AP-2 complex subunit alpha-2                                               | 104 | 6 | 156 | 10 |
| P11506 | Plasma membrane calcium-transporting ATPase 2                              | 103 | 6 | 109 | 6  |
| P12369 | cAMP-dependent protein kinase type II-beta regulatory subunit              | 99  | 6 | 88  | 5  |
| P60879 | Synaptosomal-associated protein 25                                         | 98  | 5 | 173 | 10 |
| P42123 | L-lactate dehydrogenase B chain                                            | 97  | 6 | 135 | 9  |
| P61264 | Syntaxin-1B                                                                | 96  | 6 | 139 | 8  |
| Q99PJ0 | Neurotrimin precursor                                                      | 87  | 6 | 40  | 3  |
| Q61316 | Heat shock 70 kDa protein 4                                                | 86  | 6 | 64  | 5  |
| P13233 | 2',3'-cyclic-nucleotide 3'-phosphodiesterase                               | 84  | 6 | 124 | 9  |
| P07323 | Gamma-enolase                                                              | 82  | 5 | 60  | 4  |
| P15205 | Microtubule-associated protein 1B                                          | 80  | 5 | 134 | 9  |
| P12785 | Fatty acid synthase                                                        | 77  | 5 | 96  | 6  |
| Q9QUL6 | Vesicle-fusing ATPase                                                      | 77  | 5 | 140 | 10 |
| P19627 | Guanine nucleotide-binding protein G(z) subunit alpha                      | 75  | 4 | 86  | 5  |
| Q6P502 | T-complex protein 1 subunit gamma                                          | 75  | 5 | 64  | 4  |
| P11275 | Calcium/calmodulin-dependent protein kinase type II alpha chain            | 74  | 5 | 88  | 6  |
| P47819 | Glial fibrillary acidic protein                                            | 72  | 5 | 75  | 5  |
| O35303 | Dynamin-1-like protein                                                     | 68  | 4 | 93  | 5  |
| Q8BGN3 | Ectonucleotide pyrophosphatase/phosphodiesterase family member 6 precursor | 66  | 4 | 99  | 6  |
| Q9ERB4 | Versican core protein precursor                                            | 66  | 4 | 53  | 3  |
| P60202 | Myelin proteolipid protein                                                 | 65  | 4 | 45  | 3  |
| P51863 | Vacuolar proton pump subunit d 1                                           | 63  | 4 | 64  | 4  |
| P48500 | Triosephosphate isomerase                                                  | 63  | 4 | 66  | 4  |
| Q9Z0J8 | Neuronal growth regulator 1 precursor                                      | 61  | 5 | 30  | 2  |

|        |                                                                         |           |          |           |          |
|--------|-------------------------------------------------------------------------|-----------|----------|-----------|----------|
| Q9Z2S9 | <b>Flotillin-2</b>                                                      | 60        | 4        | 46        | 4        |
| P21279 | <b>Guanine nucleotide-binding protein G(q) subunit alpha</b>            | 60        | 4        | 60        | 4        |
| P63044 | Vesicle-associated membrane protein 2                                   | 59        | 3        | 65        | 3        |
| P32736 | <b>Opioid-binding protein/cell adhesion molecule precursor</b>          | 59        | 4        | 44        | 3        |
| P02688 | Myelin basic protein S                                                  | 59        | 4        | 109       | 7        |
| Q8BVE3 | Vacuolar proton pump subunit H                                          | 59        | 4        | 51        | 3        |
| P50518 | Vacuolar proton pump subunit E 1                                        | 59        | 4        | 126       | 8        |
| P50398 | Rab GDP dissociation inhibitor alpha                                    | 57        | 4        | 84        | 5        |
| P09606 | Glutamine synthetase                                                    | 57        | 4        | 34        | 2        |
| Q07310 | Neurexin-3-alpha precursor                                              | 57        | 5        | 40        | 2        |
| P15146 | Microtubule-associated protein 2                                        | 55        | 4        | 122       | 8        |
| P45592 | <b>Cofilin-1</b>                                                        | 55        | 3        | 58        | 3        |
| P46462 | Transitional endoplasmic reticulum ATPase                               | 55        | 3        | 97        | 7        |
| Q9Z2Q6 | Septin-5                                                                | 54        | 3        | 58        | 4        |
| Q8CFG6 | Voltage-dependent calcium channel subunit alpha-2/delta-2 precursor     | 54        | 4        | 43        | 3        |
| P02091 | Hemoglobin subunit beta-1                                               | 53        | 3        | 54        | 3        |
| P02770 | Serum albumin precursor                                                 | 53        | 4        | 75        | 5        |
| P01830 | <b>Thy-1 membrane glycoprotein precursor</b>                            | 53        | 3        | 51        | 4        |
| Q8K0U4 | Heat shock 70 kDa protein 12A                                           | 53        | 4        | 52        | 4        |
| Q05175 | Brain acid soluble protein 1                                            | 52        | 3        | 75        | 4        |
| P32851 | <b>Syntaxin 1</b>                                                       | <b>52</b> | <b>3</b> | <b>50</b> | <b>3</b> |
| Q08163 | Adenylyl cyclase-associated protein 1                                   | 52        | 3        | 40        | 2        |
| P62835 | Ras-related protein Rap-1A precursor                                    | 52        | 3        | 54        | 3        |
| P07340 | <b>Sodium/potassium-transporting ATPase subunit beta-1</b>              | 51        | 3        | 36        | 2        |
| Q63345 | <b>Myelin-oligodendrocyte glycoprotein precursor</b>                    | 51        | 4        | 31        | 2        |
| Q8CFG5 | Voltage-dependent calcium channel subunit alpha-2/delta-3 precursor     | 51        | 3        | 54        | 3        |
| P62908 | 40S ribosomal protein S3                                                | 50        | 4        | 46        | 4        |
| P84091 | AP-2 complex subunit mu-1                                               | 50        | 4        | 51        | 4        |
| Q9DBG3 | AP-2 complex subunit beta-1                                             | 49        | 3        | 69        | 5        |
| P02401 | 60S acidic ribosomal protein P2                                         | 48        | 3        | 36        | 2        |
| P63328 | Serine/threonine-protein phosphatase 2B catalytic subunit alpha isoform | 48        | 4        | 51        | 4        |
| Q8BLK3 | Limbic system-associated membrane protein precursor                     | 48        | 3        | 56        | 4        |

|        |                                                                                                                    |    |   |    |   |
|--------|--------------------------------------------------------------------------------------------------------------------|----|---|----|---|
| P22063 | <b>Contactin-2 precursor</b>                                                                                       | 46 | 3 | 58 | 5 |
| P24942 | Excitatory amino acid transporter 1                                                                                | 45 | 3 | 40 | 2 |
| O55131 | Septin-7                                                                                                           | 45 | 3 | 44 | 3 |
| P08461 | Dihydrolipoyllysine-residue acetyltransferase component of pyruvate dehydrogenase complex, mitochondrial precursor | 45 | 3 | 69 | 4 |
| P08551 | Neurofilament light polypeptide                                                                                    | 44 | 3 | 54 | 4 |
| P63321 | <b>Ras-related protein Ral-A precursor</b>                                                                         | 44 | 3 | 40 | 3 |
| P18421 | Proteasome subunit beta type-1 precursor                                                                           | 44 | 3 | 47 | 3 |
| P16638 | ATP-citrate synthase                                                                                               | 43 | 4 | 54 | 4 |
| Q62420 | <b>Endophilin-A1</b>                                                                                               | 41 | 3 | 48 | 3 |
| P63038 | 60 kDa heat shock protein, mitochondrial precursor                                                                 | 41 | 3 | 58 | 4 |
| P49432 | Pyruvate dehydrogenase E1 component subunit beta, mitochondrial precursor                                          | 40 | 3 | 57 | 4 |
| Q01062 | cGMP-dependent 3',5'-cyclic phosphodiesterase                                                                      | 40 | 3 | 30 | 2 |
| P63001 | Ras-related C3 botulinum toxin substrate 1 precursor                                                               | 39 | 3 | 36 | 3 |
| Q9QYC0 | Alpha-adducin                                                                                                      | 38 | 3 | 25 | 2 |
| P41123 | 60S ribosomal protein L13                                                                                          | 38 | 3 | 47 | 3 |
| Q05140 | Clathrin coat assembly protein AP180                                                                               | 37 | 2 | 48 | 3 |
| P05064 | <b>Fructose-bisphosphate aldolase A</b>                                                                            | 37 | 2 | 67 | 4 |
| P62754 | 40S ribosomal protein S6                                                                                           | 37 | 2 | 36 | 2 |
| Q9D394 | Protein RUFY3                                                                                                      | 36 | 3 | 14 | 1 |
| P04642 | L-lactate dehydrogenase A chain                                                                                    | 36 | 3 | 54 | 5 |
| Q9Z0W5 | Protein kinase C and casein kinase substrate in neurons protein 1                                                  | 35 | 3 | 42 | 3 |
| Q04970 | GTPase NRas precursor                                                                                              | 35 | 3 | 37 | 3 |
| P09812 | Glycogen phosphorylase, muscle form                                                                                | 35 | 3 | 33 | 3 |
| P04636 | Malate dehydrogenase, mitochondrial precursor                                                                      | 34 | 2 | 48 | 3 |
| Q9WTT4 | Vacuolar proton pump subunit G 2                                                                                   | 33 | 2 | 39 | 2 |
| P35565 | <b>Calnexin precursor</b>                                                                                          | 33 | 2 | 33 | 2 |
| Q9JHU0 | Dihydropyrimidinase-related protein 5                                                                              | 32 | 2 | 55 | 4 |
| Q6AYH5 | Dynactin subunit 2                                                                                                 | 32 | 2 | 35 | 2 |
| Q6P6R2 | <b>Dihydrolipoyl dehydrogenase, mitochondrial precursor</b>                                                        | 32 | 3 | 47 | 3 |
| P06745 | Glucose-6-phosphate isomerase                                                                                      | 31 | 2 | 26 | 2 |
| Q8BPN8 | DmX-like protein 2                                                                                                 | 30 | 2 | 25 | 2 |

|        |                                                                                   |    |   |    |   |
|--------|-----------------------------------------------------------------------------------|----|---|----|---|
| P11983 | T-complex protein 1 subunit alpha B                                               | 30 | 2 | 42 | 4 |
| Q76MZ3 | Serine/threonine-protein phosphatase 2A 65 kDa regulatory subunit A alpha isoform | 30 | 2 | 56 | 4 |
| P42669 | Transcriptional activator protein Pur-alpha                                       | 30 | 2 | 21 | 1 |
| P35704 | Peroxiredoxin-2                                                                   | 28 | 2 | 39 | 3 |
| Q9JI66 | Electrogenic sodium bicarbonate cotransporter 1                                   | 28 | 2 | 40 | 3 |
| P23358 | <b>60S ribosomal protein L12</b>                                                  | 27 | 2 | 28 | 2 |
| P70704 | Probable phospholipid-transporting ATPase IA                                      | 27 | 2 | 28 | 2 |
| Q02053 | Ubiquitin-like modifier-activating enzyme 1 X                                     | 27 | 2 | 42 | 3 |
| P97685 | Neurofascin precursor                                                             | 27 | 2 | 25 | 2 |
| Q02563 | Synaptic vesicle glycoprotein 2A                                                  | 27 | 2 | 45 | 4 |
| Q7TPB1 | T-complex protein 1 subunit delta                                                 | 26 | 2 | 25 | 2 |
| O35737 | Heterogeneous nuclear ribonucleoprotein H                                         | 26 | 2 | 23 | 2 |
| Q63377 | Sodium/potassium-transporting ATPase subunit beta-3                               | 25 | 2 | 13 | 1 |
| P10126 | Elongation factor 1-alpha 1                                                       | 24 | 2 | 54 | 4 |
| Q9WTT6 | Guanine deaminase                                                                 | 24 | 2 | 32 | 2 |
| O35098 | Dihydropyrimidinase-related protein 4                                             | 23 | 2 | 26 | 2 |
| Q68FR6 | Elongation factor 1-gamma                                                         | 23 | 1 | 46 | 3 |
| Q62656 | Receptor-type tyrosine-protein phosphatase zeta precursor                         | 22 | 2 | 25 | 2 |
| P62914 | 60S ribosomal protein L11                                                         | 22 | 1 | 18 | 1 |
| P62137 | Serine/threonine-protein phosphatase PP1-alpha catalytic subunit                  | 20 | 1 | 19 | 1 |
| P07722 | Myelin-associated glycoprotein precursor                                          | 20 | 1 | 55 | 4 |
| P63213 | Guanine nucleotide-binding protein G(I)/G(S)/G(O) subunit gamma-2 precursor       | 19 | 1 | 17 | 1 |
| P70168 | Importin subunit beta-1                                                           | 18 | 1 | 21 | 1 |
| Q6PEC4 | S-phase kinase-associated protein 1                                               | 18 | 1 | 19 | 1 |
| P63081 | Vacuolar ATP synthase 16 kDa proteolipid subunit                                  | 18 | 1 | 18 | 1 |
| O08838 | Amphiphysin                                                                       | 18 | 1 | 26 | 2 |
| P62761 | Visinin-like protein 1                                                            | 18 | 1 | 44 | 3 |
| Q9QYU4 | Mu-crystallin homolog                                                             | 18 | 1 | 29 | 2 |
| P08113 | Endoplasmin precursor                                                             | 18 | 1 | 29 | 2 |
| Q62745 | CD81 antigen                                                                      | 17 | 1 | 17 | 1 |
| Q7TQD2 | Tubulin polymerization-promoting protein                                          | 17 | 1 | 18 | 1 |

|        |                                                                                     |    |   |    |   |
|--------|-------------------------------------------------------------------------------------|----|---|----|---|
| P68181 | cAMP-dependent protein kinase catalytic subunit beta                                | 17 | 1 | 17 | 1 |
| P01946 | <b>Hemoglobin subunit alpha-1/2</b>                                                 | 17 | 1 | 65 | 4 |
| Q99PT1 | Rho GDP-dissociation inhibitor 1                                                    | 16 | 1 | 19 | 1 |
| P13084 | Nucleophosmin                                                                       | 16 | 1 | 17 | 1 |
| Q9DAS9 | <b>Guanine nucleotide-binding protein G(I)/G(S)/G(O) subunit gamma-12 precursor</b> | 16 | 1 | 16 | 1 |
| P62900 | 60S ribosomal protein L31                                                           | 16 | 1 | 17 | 1 |
| P14148 | 60S ribosomal protein L7                                                            | 15 | 1 | 16 | 1 |
| P50153 | Guanine nucleotide-binding protein G(I)/G(S)/G(O) subunit gamma-4 precursor         | 15 | 1 | 15 | 1 |
| P57746 | Vacuolar proton pump subunit D                                                      | 15 | 1 | 43 | 3 |
| P26453 | <b>Basigin precursor</b>                                                            | 15 | 1 | 18 | 1 |
| P62242 | 40S ribosomal protein S8                                                            | 15 | 1 | 16 | 1 |
| P50408 | Vacuolar proton pump subunit F                                                      | 15 | 1 | 41 | 3 |
| Q61753 | D-3-phosphoglycerate dehydrogenase                                                  | 14 | 1 | 39 | 3 |
| Q9JM76 | Actin-related protein 2/3 complex subunit 3                                         | 14 | 1 | 13 | 1 |
| Q6VBQ5 | <b>Myeloid-associated differentiation marker</b>                                    | 14 | 1 | 15 | 1 |
| O55143 | Sarcoplasmic/endoplasmic reticulum calcium ATPase 2                                 | 14 | 1 | 32 | 2 |
| P19944 | 60S acidic ribosomal protein P1                                                     | 13 | 1 | 16 | 1 |
| P52481 | Adenylyl cyclase-associated protein 2                                               | 13 | 1 | 14 | 1 |
| P97536 | Cullin-associated NEDD8-dissociated protein 1                                       | 13 | 1 | 60 | 4 |
| O54874 | Serine/threonine-protein kinase MRCK alpha                                          | 12 | 1 | 13 | 1 |
| P80313 | T-complex protein 1 subunit eta                                                     | 12 | 1 | 16 | 1 |

(a) Common DRM proteins found in two different extraction methods, (b) only by the Folch method or (c) only by acetone precipitation were listed. The previously identified GSAPs, syntaxin1 and basigin (CD147) are marked in blue. Previously reported lipid raft proteins were shown in bold.

**Supplementary Table S1b.** List of proteins found in DRMs.

| <b>Folch method</b> |                                                                    |              |                       |
|---------------------|--------------------------------------------------------------------|--------------|-----------------------|
| <b>Accession No</b> | <b>Protein name</b>                                                | <b>Score</b> | <b>Unique peptide</b> |
| P47857              | 6-phosphofructokinase, muscle type                                 | 139          | 8                     |
| P46097              | Synaptotagmin-2                                                    | 87           | 6                     |
| Q63537              | Synapsin-2                                                         | 73           | 4                     |
| P63011              | Ras-related protein Rab-3A                                         | 64           | 4                     |
| P61164              | Alpha-centractin                                                   | 51           | 3                     |
| P14152              | Malate dehydrogenase, cytoplasmic                                  | 48           | 4                     |
| P31596              | Excitatory amino acid transporter 2                                | 39           | 3                     |
| P84082              | ADP-ribosylation factor 2                                          | 33           | 2                     |
| Q9D8W5              | 26S proteasome non-ATPase regulatory subunit 12                    | 32           | 2                     |
| P12001              | 60S ribosomal protein L18                                          | 32           | 2                     |
| Q9R1T4              | Septin-6                                                           | 32           | 2                     |
| Q80V42              | <b>Carboxypeptidase M precursor</b>                                | 31           | 3                     |
| P35803              | Neuronal membrane glycoprotein M6-b                                | 29           | 2                     |
| P62631              | Elongation factor 1-alpha 2                                        | 27           | 2                     |
| P97829              | Leukocyte surface antigen CD47 precursor                           | 27           | 2                     |
| O88685              | 26S protease regulatory subunit 6A                                 | 26           | 2                     |
| Q641Y8              | ATP-dependent RNA helicase DDX1                                    | 25           | 2                     |
| Q9J112              | Vesicular glutamate transporter 2                                  | 24           | 2                     |
| P10833              | <b>Ras-related protein R-Ras precursor</b>                         | 23           | 2                     |
| Q64428              | <b>Trifunctional enzyme subunit alpha, mitochondrial precursor</b> | 22           | 2                     |
| Q9WV92              | Band 4.1-like protein 3                                            | 20           | 2                     |
| O35095              | Neurochondrin                                                      | 19           | 1                     |
| P07936              | Neuromodulin                                                       | 19           | 1                     |
| O70251              | Elongation factor 1-beta                                           | 18           | 2                     |
| O35609              | Secretory carrier-associated membrane protein 3                    | 17           | 1                     |
| P35427              | 60S ribosomal protein L13a                                         | 16           | 1                     |
| P39069              | Adenylate kinase isoenzyme 1                                       | 16           | 1                     |
| Q91XU8              | Phosphatidate cytidyltransferase 2                                 | 16           | 1                     |
| P27274              | CD59 glycoprotein precursor                                        | 15           | 1                     |

|        |                                                                                          |    |   |
|--------|------------------------------------------------------------------------------------------|----|---|
| Q8CFV4 | Neuritin precursor                                                                       | 15 | 1 |
| Q924N5 | Long-chain-fatty-acid--CoA ligase ACSBG1                                                 | 15 | 1 |
| P11167 | <b>Solute carrier family 2, facilitated glucose transporter member 1</b>                 | 15 | 1 |
| P09527 | Ras-related protein Rab-7a                                                               | 14 | 1 |
| P35486 | Pyruvate dehydrogenase E1 component subunit alpha, somatic form, mitochondrial precursor | 14 | 1 |
| P23978 | Sodium- and chloride-dependent GABA transporter 1                                        | 14 | 1 |
| P28023 | Dynactin subunit 1                                                                       | 14 | 1 |
| P28661 | Septin-4                                                                                 | 13 | 1 |
| P00405 | <b>Cytochrome c oxidase subunit 2</b>                                                    | 13 | 1 |
| Q5DQR4 | Syntaxin-binding protein 5-like                                                          | 12 | 1 |



**Supplementary Table S1c.** List of proteins found in DRMs.

| <b>Aceton precipitation</b> |                                                                  |              |                       |
|-----------------------------|------------------------------------------------------------------|--------------|-----------------------|
| <b>Accession No</b>         | <b>Protein name</b>                                              | <b>Score</b> | <b>Unique peptide</b> |
| P47860                      | 6-phosphofructokinase type C                                     | 111          | 8                     |
| P46096                      | Synaptotagmin-1                                                  | 110          | 7                     |
| P09951                      | Synapsin-1                                                       | 103          | 7                     |
| Q63912                      | <b>Oligodendrocyte-myelin glycoprotein precursor</b>             | 54           | 4                     |
| P68254                      | 14-3-3 protein theta                                             | 54           | 3                     |
| P62259                      | 14-3-3 protein epsilon                                           | 52           | 4                     |
| P80317                      | <b>T-complex protein 1 subunit zeta</b>                          | 50           | 4                     |
| P61027                      | Ras-related protein Rab-10                                       | 46           | 3                     |
| Q60864                      | Stress-induced-phosphoprotein 1                                  | 44           | 3                     |
| Q3UHL1                      | CaM kinase-like vesicle-associated protein                       | 39           | 3                     |
| Q794F9                      | 4F2 cell-surface antigen heavy chain                             | 37           | 3                     |
| P12839                      | Neurofilament medium polypeptide                                 | 37           | 3                     |
| Q5SQX6                      | Cytoplasmic FMR1-interacting protein 2                           | 36           | 3                     |
| Q9QWN8                      | Spectrin beta chain, brain 2                                     | 36           | 3                     |
| Q8R5C5                      | Beta-centractin                                                  | 35           | 2                     |
| Q60668                      | Heterogeneous nuclear ribonucleoprotein D0                       | 32           | 2                     |
| P60764                      | Ras-related C3 botulinum toxin substrate 3 precursor             | 31           | 3                     |
| Q91Y81                      | Septin-2                                                         | 31           | 2                     |
| Q62871                      | Cytoplasmic dynein 1 intermediate chain 2                        | 31           | 2                     |
| Q80ZJ1                      | Ras-related protein Rap-2a precursor                             | 31           | 2                     |
| Q9WTR5                      | <b>Cadherin-13 precursor</b>                                     | 31           | 2                     |
| P18422                      | Proteasome subunit alpha type-3                                  | 30           | 2                     |
| P10687                      | 1-phosphatidylinositol-4,5-bisphosphate phosphodiesterase beta-1 | 29           | 2                     |
| Q9EPH8                      | Polyadenylate-binding protein 1                                  | 28           | 2                     |
| Q35136                      | Neural cell adhesion molecule 2 precursor                        | 28           | 2                     |
| Q7TNR6                      | Immunoglobulin superfamily member 21 precursor                   | 28           | 2                     |
| P62334                      | 26S protease regulatory subunit S10B                             | 27           | 2                     |
| P55066                      | Neurocan core protein precursor                                  | 26           | 2                     |
| P28738                      | Kinesin heavy chain isoform 5C                                   | 26           | 2                     |

|        |                                                                                                                             |    |   |
|--------|-----------------------------------------------------------------------------------------------------------------------------|----|---|
| Q61879 | Myosin-10                                                                                                                   | 26 | 2 |
| Q80WM4 | Hyaluronan and proteoglycan link protein 4 precursor                                                                        | 25 | 2 |
| Q64559 | Cytosolic acyl coenzyme A thioester hydrolase                                                                               | 25 | 2 |
| P28663 | Beta-soluble NSF attachment protein                                                                                         | 25 | 2 |
| P06907 | Myelin P0 protein precursor                                                                                                 | 24 | 2 |
| P46471 | 26S protease regulatory subunit 7                                                                                           | 24 | 2 |
| P21533 | 60S ribosomal protein L6                                                                                                    | 24 | 2 |
| P41565 | Isocitrate dehydrogenase [NAD] subunit gamma, mitochondrial precursor                                                       | 24 | 2 |
| Q6AY30 | Probable saccharopine dehydrogenase                                                                                         | 23 | 2 |
| Q99104 | Myosin-Va                                                                                                                   | 23 | 2 |
| P61979 | Heterogeneous nuclear ribonucleoprotein K                                                                                   | 22 | 2 |
| Q9D2G2 | Dihydropyridyllysine-residue succinyltransferase component of 2-oxoglutarate dehydrogenase complex, mitochondrial precursor | 22 | 1 |
| P28667 | MARCKS-related protein                                                                                                      | 22 | 1 |
| P55012 | Solute carrier family 12 member 2                                                                                           | 21 | 2 |
| Q64433 | 10 kDa heat shock protein, mitochondrial                                                                                    | 21 | 1 |
| Q63041 | Alpha-1-macroglobulin precursor                                                                                             | 20 | 2 |
| Q5FVI6 | Vacuolar proton pump subunit C 1                                                                                            | 20 | 2 |
| Q05962 | ADP/ATP translocase 1                                                                                                       | 19 | 2 |
| P55161 | Nck-associated protein 1                                                                                                    | 19 | 2 |
| P63004 | Platelet-activating factor acetylhydrolase IB subunit alpha                                                                 | 18 | 1 |
| Q8K0T0 | Reticulon-1                                                                                                                 | 18 | 2 |
| Q1WIM1 | Cell adhesion molecule 4 precursor                                                                                          | 18 | 1 |
| P63276 | 40S ribosomal protein S17                                                                                                   | 18 | 1 |
| Q66H42 | Ly6/PLAUR domain-containing protein 1 precursor                                                                             | 18 | 1 |
| Q9QZB0 | Regulator of G-protein signaling 17                                                                                         | 17 | 1 |
| Q8CFN2 | Cell division control protein 42 homolog precursor                                                                          | 17 | 1 |
| P62315 | Small nuclear ribonucleoprotein Sm D1                                                                                       | 16 | 1 |
| O08839 | Myc box-dependent-interacting protein 1                                                                                     | 16 | 1 |
| Q62910 | Synaptojanin-1                                                                                                              | 16 | 1 |
| P08289 | <b>Alkaline phosphatase, tissue-nonspecific isozyme precursor</b>                                                           | 16 | 1 |
| P61161 | Actin-related protein 2                                                                                                     | 16 | 1 |
| P70296 | Phosphatidylethanolamine-binding protein 1                                                                                  | 15 | 1 |

|        |                                                               |    |   |
|--------|---------------------------------------------------------------|----|---|
| P62918 | 60S ribosomal protein L8                                      | 15 | 1 |
| Q6ZQ18 | Protein EFR3 homolog B                                        | 15 | 1 |
| Q8C522 | Endonuclease domain-containing 1 protein precursor            | 15 | 1 |
| P62082 | 40S ribosomal protein S7                                      | 14 | 1 |
| P62748 | Hippocalcin-like protein 1                                    | 13 | 1 |
| Q9DBC7 | cAMP-dependent protein kinase type I-alpha regulatory subunit | 12 | 1 |
| Q3UHD9 | Centaurin-gamma-1                                             | 12 | 1 |
| Q6Q0N1 | Cytosolic non-specific dipeptidase                            | 12 | 1 |
